# Supplementary material
Source: PubMed Central journal article supplement (PMC2412932)
Supplement: rsbl20070496s10.pdf [file rsbl20070496s10.pdf]

## Supplementary Electronic Material

### Appendix 1. Literature sources for the data presented in figure 1 and Appendix 2.

- Arizmendi, M. C. & Ornelas, J. F. 1990 Hummingbirds and their floral resources in a tropical dry forest in Mexico. *Biotropica* **22**, 172-180.
- Baker, H. G. 1975 Sugar concentrations in nectars from hummingbird flowers. *Biotropica* **7**, 37-41.
- Baker, H. G. & Baker, I. 1982 Chemical constituents of nectar in relation to pollination mechanisms and phylogeny. In *Biochemical Aspects of Evolutionary Biology* (ed. M. H. Nitecki), pp. 131-171. Chicago: University of Chicago Press.
- Baker, H. G., Baker, I. & Hodges, S. A. 1998 Sugar composition of nectars and fruits consumed by birds and bats in the tropics and subtropics. *Biotropica* **30**, 559-586.
- Barnes, K., Nicolson, S. W. & van Wyk, B.-E. 1995 Nectar sugar composition in *Erica*. *Biochemical Systematics and Ecology* **23**, 419-423.
- Bolten, A. B. 1978 Why do hummingbird flowers secrete dilute nectar? *Biotropica* **10**, 307-309.
- Brown, J. H. & Kodric-Brown, A. 1979 Convergence, competition, and mimicry in a temperate community of hummingbird-pollinated flowers. *Ecology* **60**, 1022-1035.
- Corbet, S. A. & Wilmer, P. G. 1981 The nectar of *Justicia* and *Columnnea*: composition and concentration in a humid tropical climate. *Oecologia* **51**, 412-418.
- Cotton, P. A. 2001 The behavior and interactions of birds visiting *Erythrina fusca* flowers in the Colombian Amazon. *Biotropica* **33**, 662-669.
- Cruden, R. W. & Hermann, S. M. 1983 Studying nectar? some observations on the art. In *The Biology of Nectaries* (ed. B. Bentley & T. S. Elias), pp. 223-242. New York: Columbia University Press.
- Cruden, R. W. & Toledo, V. M. 1977 Oriole pollination of *Erythrina brevifolia* (Leguminosae): evidence for a polytypic view of ornithophily. *Plant Systematics and Evolution* **126**, 393-403.
- Elisens, W. J. & Freeman, C. E. 1988 Floral nectar sugar composition and pollinator type among new world genera in tribe Antirrhineae (Scrophulariaceae). *American Journal of Botany* **75**, 971-978.
- Etcheverry, A. V. & Aleman, C. E. T. 2005 Reproductive biology of *Erythrina falcata* (Fabaceae : Papilionoideae). *Biotropica* **37**, 54-63.
- Feinsinger, P., Colwell, R. K., Terborgh, J. & Budd Chaplin, S. 1979 Elevation and the morphology, flight energetics and foraging ecology of tropical hummingbirds. *American Naturalist* **113**, 481-497.
- Freeman, C. E., Reid, W. H. & Becvar, J. E. 1983 Nectar sugar composition in some species of *Agave* (Agavaceae). *Madrono* **30**, 153-158.
- Freeman, C. E., Reid, W. H., Becvar, J. E. & Scogin, R. 1984 Similarity and apparent convergence in the nectar-sugar composition of some hummingbird-pollinated flowers. *Botanical Gazette* **145**, 132-135.

- Freeman, C. E. & Worthington, R. D. 1985 Some floral nectar-sugar compositions of species from southeastern Arizona and southwestern New Mexico. *Madrono* **32**, 78-86.
- Galetto, L., Bernardello, G., Isele, I. C., Vesprini, J., Speroni, G. & Berduc, A. 2000 Reproductive biology of *Erythrina crista-galli* (Fabaceae). *Annals of the Missouri Botanical Garden* **87**, 127-145.
- Goldblatt, P., Manning, J. C. & Bernhardt, P. 1999 Evidence of bird pollination in Iridaceae of southern Africa. *Adansonia* **21**, 25-40.
- Gottsberger, G., Schrauwen, J. & Liskens, H. F. 1984 Amino acids and sugars in nectar, and their putative evolutionary significance. *Plant Systematics and Evolution*, 55-77.
- Hainsworth, F. R. 1973 On the tongue of a hummingbird: its role in the rate and energetics of feeding. *Comp. Biochem. Physiol.* **46A**, 65-78.
- Hainsworth, F. R. & Wolf, L. L. 1972 Crop volume, nectar concentration and hummingbird energetics. *Comp. Biochem. Physiol. A* **42**, 359-366.
- Hainsworth, F. R. & Wolf, L. L. 1976 Nectar characteristics and food selection by hummingbirds. *Oecologia* **25**, 101-113.
- Hernandez, H. M. & Toledo, V. M. 1979 The role of nectar robbers and pollinators in the reproduction of *Erythrina leptorrhiza*. *Annals of the Missouri Botanical Garden* **66**, 512-520.
- Heyneman, A. J. 1983 Optimal sugar concentrations of floral nectars: dependence on sugar intake efficiency and foraging costs. *Oecologia (Berlin)* **60**, 198-213.
- Johnson, S. D. & Bond, W. J. 1994 Red flowers and butterfly pollination in the fynbos of South Africa. In *Plant-Animal Interactions in Mediterranean-Type Ecosystems* (ed. M. Arianoutsou & R. H. Groves), pp. 137-148. Dordrecht: Kluwer Academic Publishers.
- Johnson, S. D. & Brown, M. 2004 Transfer of pollinaria on bird's feet: a new pollination system in orchids. *Plant Systematics and Evolution* **244**, 181-188.
- Koptur, S. 1994 Floral and extrafloral nectars of Costa Rican *Inga* trees: a comparison of their constituents and composition. *Biotropica* **26**, 276-284.
- Lanza, J., Smith, G. C., Sack, S. & Cash, A. 1995 Variation in nectar volume and composition of *Impatiens capensis* at the individual plant level. *Oecologia* **102**, 113-119.
- Linder, H. P., Dlamini, T., Henning, J. & Verboom, G. A. 2006 The evolutionary history of *Melianthus* (Melianthaceae). *American Journal of Botany* **93**, 1052-1064.
- McDade, L. A. & Weeks, J. A. 2004a Nectar in hummingbird-pollinated neotropical plants I: Patterns of production and variability in 12 species. *Biotropica* **36**, 196-215.
- McDade, L. A. & Weeks, J. A. 2004b Nectar in hummingbird-pollinated neotropical plants II: Interactions with flower visitors. *Biotropica* **36**, 216-230.
- Neill, D. A. 1987 Trapliners in the trees: hummingbird pollination of *Erythrina* sect. *Erythrina* (Leguminosae: Papilionoideae). *Annals of the Missouri Botanical Garden* **74**, 27-41.
- Nicolson, S. W. 2002 Pollination by passerine birds: why are the nectars so dilute? *Comp. Biochem. Physiol. B* **131**, 645-652.

- Nicolson, S. W. & Nepi, M. 2005 Dilute nectar in dry atmospheres: Nectar secretion patterns in *Aloe castanea* (Asphodelaceae). *International Journal of Plant Sciences* **166**, 227-233.
- Pauw, A. 1998 Pollen transfer on bird's tongues. *Nature* **394**, 731-732.
- Percival, M. S. 1965 *Floral Biology*. Oxford: Pergamon.
- Pyke, G. H. & Waser, N. M. 1981 The production of dilute nectars by hummingbird and honeyeater flowers. *Biotropica* **13**, 260-270.
- Steiner, K. E. 1979. Passerine Pollination of *Erythrina-Megistophylla* Diels (Fabaceae). *Annals of the Missouri Botanical Garden* **66**, 490-502.
- Stiles, F. G. & Freeman, C. E. 1993 Patterns in floral nectar characteristics of some bird-visited plant species from Costa Rica. *Biotropica* **25**, 191-205.
- Vos, W. T., Edwards, T. J. & van Staden, J. 1994 Pollination biology of annual and perennial *Leonotis* species (Lamiaceae). *Plant Systematics and Evolution* **192**, 1-9.
