# Supplementary material
Source: PubMed Central journal article supplement (PMC2412932)
Supplement: rsbl20070496s11.pdf [file rsbl20070496s11.pdf]

## Supplementary Electronic Material

Appendix 2. Mean nectar trait values for species in a genus that share a particular bird pollination system. Sample size is the number of species used to calculate each grand mean. Grand means were used for the analyses in figure 1. Source references are given in Appendix 1.

| Region   | Bird pollination system | Genus                | Nectar volume (µl) |    | Nectar concentration (%) |    | Sucrose proportion (%) |    |
|----------|-------------------------|----------------------|--------------------|----|--------------------------|----|------------------------|----|
|          |                         |                      | Mean               | n  | Mean                     | n  | Mean                   | n  |
| Africa   | Generalized             | <i>Aloe</i>          | 60.2               | 10 | 9.0                      | 10 | 0.7                    | 3  |
| Africa   | Generalized             | <i>Erythrina</i>     | 194.8              | 2  | 9.3                      | 2  | 6.0                    | 2  |
| Africa   | Generalized             | <i>Greyia</i>        | 15.6               | 3  | 8.5                      | 3  |                        | 1  |
| Africa   | Generalized             | <i>Melianthus</i>    | 49.2               | 7  | 11.8                     | 7  | 1.5                    | 2  |
| Africa   | Generalized             | <i>Schotia</i>       | 166.6              | 1  | 12.2                     | 1  | 2.0                    | 1  |
| Africa   | Generalized             | <i>Spathodea</i>     |                    |    | 5.4                      | 1  |                        |    |
| Africa   | Generalized             | <i>Strelitzia</i>    | 377.9              | 2  | 14.3                     | 2  |                        | 1  |
| Africa   | Specialized             | <i>Aloe</i>          | 14.8               | 9  | 19.6                     | 9  | 0.3                    | 3  |
| Africa   | Specialized             | <i>Babiana</i>       | 26.3               | 3  | 23.3                     | 3  | 67.0                   | 2  |
| Africa   | Specialized             | <i>Brunsvigia</i>    | 13.2               | 1  | 34.8                     | 1  | 58.0                   | 1  |
| Africa   | Specialized             | <i>Burchellia</i>    | 4.5                | 1  | 28.0                     | 1  |                        |    |
| Africa   | Specialized             | <i>Chasmanthe</i>    | 16.1               | 3  | 13.7                     | 3  | 7.8                    | 3  |
| Africa   | Specialized             | <i>Clivia</i>        | 5.5                | 1  | 13.0                     | 1  |                        |    |
| Africa   | Specialized             | <i>Cotyledon</i>     | 43.8               | 2  | 23.9                     | 2  | 1.0                    | 1  |
| Africa   | Specialized             | <i>Crocosomia</i>    | 12.0               | 1  | 18.0                     | 1  | 39.0                   | 1  |
| Africa   | Specialized             | <i>Cyrtanthus</i>    | 1.1                | 1  | 15.2                     | 1  |                        |    |
| Africa   | Specialized             | <i>Disa</i>          | 4.6                | 2  | 10.4                     | 2  |                        |    |
| Africa   | Specialized             | <i>Erica</i>         | 6.4                | 23 | 19.6                     | 25 | 78.8                   | 24 |
| Africa   | Specialized             | <i>Gladiolus</i>     | 20.1               | 15 | 27.6                     | 15 | 64.0                   | 12 |
| Africa   | Specialized             | <i>Haemanthus</i>    | 3.8                | 2  | 28.4                     | 2  | 3.0                    | 1  |
| Africa   | Specialized             | <i>Kalanchoe</i>     |                    |    | 20.7                     | 1  | 1.0                    | 1  |
| Africa   | Specialized             | <i>Kniphofia</i>     | 5.7                | 2  | 11.3                     | 2  |                        |    |
| Africa   | Specialized             | <i>Leonotis</i>      | 10.4               | 2  | 25.8                     | 2  | 61.8                   | 2  |
| Africa   | Specialized             | <i>Liparia</i>       |                    |    | 36.7                     | 1  | 72.0                   | 1  |
| Africa   | Specialized             | <i>Microloma</i>     | 14.2               | 1  | 23.6                     | 1  | 30.0                   | 1  |
| Africa   | Specialized             | <i>Satyrium</i>      | 6.6                | 3  | 27.8                     | 3  | 90.0                   | 3  |
| Africa   | Specialized             | <i>Syncelostemon</i> | 2.3                | 1  | 21.6                     | 1  |                        |    |
| Africa   | Specialized             | <i>Tecomaria</i>     | 5.5                | 1  | 17.5                     | 1  | 12.0                   | 1  |
| Africa   | Specialized             | <i>Tritoniopsis</i>  | 10.2               | 7  | 26.0                     | 7  | 80.3                   | 6  |
| Africa   | Specialized             | <i>Watsonia</i>      | 48.7               | 10 | 19.0                     | 10 | 52.4                   | 10 |
| Americas | Generalized             | <i>Agave</i>         |                    |    |                          |    | 10.3                   | 4  |
| Americas | Generalized             | <i>Erythrina</i>     | 102.9              | 5  | 13.6                     | 8  | 3.7                    | 6  |
| Americas | Generalized             | <i>Marcgravia</i>    |                    |    |                          |    | 3.0                    | 1  |
| Americas | Generalized             | <i>Norantea</i>      |                    |    |                          |    | 2.0                    | 1  |
| Americas | Generalized             | <i>Opuntia</i>       |                    |    | 22.0                     | 1  |                        |    |
| Americas | Generalized             | <i>Oryctabthus</i>   |                    |    |                          |    |                        | 1  |
| Americas | Generalized             | <i>Puya</i>          |                    |    |                          |    | 2.3                    | 3  |
| Americas | Generalized             | <i>Tricanthera</i>   |                    |    |                          |    | 16.0                   | 1  |
| Americas | Specialized             | <i>Abutilon</i>      |                    |    | 32.8                     | 2  | 51.5                   | 2  |

|          |             |                     |      |   |      |    |      |    |
|----------|-------------|---------------------|------|---|------|----|------|----|
| Americas | Specialized | <i>Aechmea</i>      |      |   | 23.1 | 1  | 76.8 | 1  |
| Americas | Specialized | <i>Agastache</i>    | 2.4  | 1 | 24.7 | 1  |      |    |
| Americas | Specialized | <i>Agave</i>        |      |   | 10.0 | 1  |      |    |
| Americas | Specialized | <i>Alloplectus</i>  |      |   | 20.2 | 2  | 70.4 | 2  |
| Americas | Specialized | <i>Anisacanthus</i> |      |   | 34.1 | 1  |      |    |
| Americas | Specialized | <i>Aphelandra</i>   | 14.2 | 2 | 24.8 | 5  | 53.7 | 3  |
| Americas | Specialized | <i>Aquilegia</i>    | 1.2  | 1 | 39.1 | 3  | 89.5 | 2  |
| Americas | Specialized | <i>Arbutus</i>      |      |   |      |    | 68.0 | 1  |
| Americas | Specialized | <i>Bauhinia</i>     |      |   |      |    | 55.3 | 7  |
| Americas | Specialized | <i>Beloperone</i>   |      |   | 41.2 | 1  |      |    |
| Americas | Specialized | <i>Besleria</i>     |      |   | 21.1 | 2  | 84.9 | 2  |
| Americas | Specialized | <i>Bomarea</i>      |      |   | 16.4 | 2  | 77.6 | 2  |
| Americas | Specialized | <i>Bonplandia</i>   |      |   |      |    | 64.0 | 1  |
| Americas | Specialized | <i>Bouvardia</i>    |      |   | 16.4 | 1  | 49.0 | 3  |
| Americas | Specialized | <i>Brachyotus</i>   |      |   | 20.8 | 1  |      |    |
| Americas | Specialized | <i>Brodiaea</i>     |      |   | 27.0 | 1  |      |    |
| Americas | Specialized | <i>Brugmansia</i>   |      |   |      |    | 55.0 | 1  |
| Americas | Specialized | <i>Burmeistera</i>  |      |   |      |    | 36.0 | 1  |
| Americas | Specialized | <i>Calliandra</i>   |      |   |      |    | 13.0 | 1  |
| Americas | Specialized | <i>Campsis</i>      | 4.7  | 1 | 23.6 | 2  | 73.0 | 1  |
| Americas | Specialized | <i>Cantua</i>       |      |   |      |    | 71.0 | 3  |
| Americas | Specialized | <i>Castilleja</i>   | 3.9  | 3 | 29.4 | 8  | 71.2 | 7  |
| Americas | Specialized | <i>Cavendisha</i>   |      |   | 19.5 | 7  | 73.9 | 9  |
| Americas | Specialized | <i>Centropogon</i>  |      |   | 18.8 | 8  | 68.3 | 5  |
| Americas | Specialized | <i>Cephaelia</i>    |      |   | 22.5 | 2  | 78.9 | 2  |
| Americas | Specialized | <i>Cestrum</i>      |      |   | 15.5 | 2  | 62.5 | 2  |
| Americas | Specialized | <i>Chuquiraga</i>   |      |   | 24.8 | 1  |      |    |
| Americas | Specialized | <i>Cirsium</i>      |      |   | 18.1 | 1  |      |    |
| Americas | Specialized | <i>Clerodendrum</i> |      |   |      |    | 84.0 | 1  |
| Americas | Specialized | <i>Columnea</i>     |      |   | 29.0 | 10 | 77.3 | 10 |
| Americas | Specialized | <i>Cordia</i>       |      |   | 16.3 | 3  |      |    |
| Americas | Specialized | <i>Costus</i>       |      |   | 30.3 | 5  | 98.8 | 3  |
| Americas | Specialized | <i>Cuphea</i>       | 14.5 | 1 | 25.5 | 1  | 70.3 | 3  |
| Americas | Specialized | <i>Datura</i>       |      |   | 23.1 | 1  |      |    |
| Americas | Specialized | <i>Delphinium</i>   |      |   | 36.2 | 2  |      |    |
| Americas | Specialized | <i>Distictis</i>    |      |   |      |    | 59.0 | 2  |
| Americas | Specialized | <i>Drymonia</i>     |      |   | 27.0 | 4  | 60.9 | 6  |
| Americas | Specialized | <i>Echeveria</i>    |      |   |      |    | 36.0 | 1  |
| Americas | Specialized | <i>Echinocereus</i> |      |   | 42.3 | 1  | 82.0 | 1  |
| Americas | Specialized | <i>Erythrina</i>    | 36.4 | 1 | 30.6 | 1  | 45.0 | 1  |
| Americas | Specialized | <i>Erythrina</i>    | 13.3 | 3 | 29.0 | 25 | 54.8 | 23 |
| Americas | Specialized | <i>Eucnide</i>      |      |   |      |    | 85.0 | 1  |
| Americas | Specialized | <i>Euphorbia</i>    |      |   |      |    | 9.0  | 1  |
| Americas | Specialized | <i>Fouquieria</i>   |      |   | 41.7 | 1  | 63.8 | 2  |
| Americas | Specialized | <i>Fridericia</i>   |      |   | 35.0 | 1  | 69.0 | 1  |
| Americas | Specialized | <i>Fuchsia</i>      |      |   | 18.8 | 7  | 57.3 | 10 |
| Americas | Specialized | <i>Gaiadendron</i>  |      |   | 18.0 | 2  |      |    |
| Americas | Specialized | <i>Galvesia</i>     |      |   | 23.0 | 1  | 80.0 | 1  |
| Americas | Specialized | <i>Gambelia</i>     |      |   |      |    | 68.9 | 1  |
| Americas | Specialized | <i>Gaultheria</i>   |      |   | 12.0 | 1  |      |    |

|          |             |                        |      |   |      |    |      |    |
|----------|-------------|------------------------|------|---|------|----|------|----|
| Americas | Specialized | <i>Gibsoniothamnus</i> |      |   | 25.1 | 1  | 68.0 | 1  |
| Americas | Specialized | <i>Gonzalegunia</i>    |      |   | 22.2 | 1  | 59.7 | 1  |
| Americas | Specialized | <i>Hamelia</i>         |      |   | 18.0 | 2  | 69.8 | 1  |
| Americas | Specialized | <i>Hedeoma</i>         | 2.2  | 1 | 15.8 | 1  |      |    |
| Americas | Specialized | <i>Heliconia</i>       |      |   | 24.8 | 25 | 68.1 | 25 |
| Americas | Specialized | <i>Helicteres</i>      |      |   | 22.0 | 1  | 78.0 | 1  |
| Americas | Specialized | <i>Hibiscus</i>        |      |   | 24.0 | 1  | 5.6  | 1  |
| Americas | Specialized | <i>Impatiens</i>       |      |   |      |    | 33.3 | 1  |
| Americas | Specialized | <i>Inga</i>            |      |   |      |    | 45.5 | 9  |
| Americas | Specialized | <i>Lochroma</i>        |      |   |      |    | 55.0 | 1  |
| Americas | Specialized | <i>Ipomoea</i>         |      |   | 27.0 | 2  | 50.0 | 1  |
| Americas | Specialized | <i>Ipomopsis</i>       |      |   | 25.1 | 1  | 69.5 | 1  |
| Americas | Specialized | <i>Iris</i>            |      |   | 8.0  | 1  |      |    |
| Americas | Specialized | <i>Isertia</i>         | 1.5  | 1 | 22.1 | 1  |      |    |
| Americas | Specialized | <i>Isertia</i>         |      |   | 24.4 | 1  |      |    |
| Americas | Specialized | <i>Jacobina</i>        |      |   | 37.0 | 2  | 70.0 | 1  |
| Americas | Specialized | <i>Justicia</i>        | 5.7  | 1 | 22.7 | 5  | 65.4 | 5  |
| Americas | Specialized | <i>Keckiella</i>       |      |   |      |    | 54.0 | 1  |
| Americas | Specialized | <i>Kohleria</i>        |      |   | 18.5 | 2  | 72.5 | 3  |
| Americas | Specialized | <i>Lamourouxia</i>     | 7.5  | 1 | 15.9 | 1  | 66.0 | 1  |
| Americas | Specialized | <i>Lapageria</i>       |      |   |      |    | 72.0 | 1  |
| Americas | Specialized | <i>Leonotis</i>        | 4.7  | 1 | 15.7 | 1  | 66.0 | 1  |
| Americas | Specialized | <i>Lilium</i>          |      |   | 13.0 | 2  |      |    |
| Americas | Specialized | <i>Loasa</i>           |      |   | 17.3 | 1  | 67.9 | 1  |
| Americas | Specialized | <i>Lobelia</i>         | 23.8 | 2 | 20.1 | 4  | 65.8 | 1  |
| Americas | Specialized | <i>Loeselia</i>        | 1.1  | 1 | 29.9 | 1  | 41.3 | 3  |
| Americas | Specialized | <i>Lonicera</i>        | 4.7  | 1 | 23.9 | 1  | 63.0 | 2  |
| Americas | Specialized | <i>Lopezia</i>         |      |   |      |    | 73.0 | 2  |
| Americas | Specialized | <i>Lophospermum</i>    |      |   |      |    | 85.5 | 2  |
| Americas | Specialized | <i>Mabrya</i>          |      |   |      |    | 85.2 | 3  |
| Americas | Specialized | <i>Macleania</i>       |      |   | 15.2 | 1  | 76.0 | 1  |
| Americas | Specialized | <i>Macromeria</i>      |      |   |      |    | 86.0 | 1  |
| Americas | Specialized | <i>Malaviscus</i>      |      |   | 21.4 | 3  | 56.3 | 2  |
| Americas | Specialized | <i>Mandevilla</i>      |      |   | 31.4 | 1  | 70.0 | 1  |
| Americas | Specialized | <i>Mimulus</i>         |      |   | 21.0 | 3  | 72.3 | 3  |
| Americas | Specialized | <i>Mirabilis</i>       |      |   | 21.0 | 1  | 71.0 | 1  |
| Americas | Specialized | <i>Monardella</i>      |      |   | 14.0 | 1  |      |    |
| Americas | Specialized | <i>Morinda</i>         |      |   | 22.0 | 1  |      |    |
| Americas | Specialized | <i>Mutisia</i>         |      |   | 23.7 | 1  | 18.0 | 1  |
| Americas | Specialized | <i>Neopalia</i>        |      |   |      |    | 70.0 | 1  |
| Americas | Specialized | <i>Nicotiana</i>       |      |   | 24.0 | 1  | 47.0 | 1  |
| Americas | Specialized | <i>Nopalea</i>         |      |   | 27.3 | 1  |      |    |
| Americas | Specialized | <i>Odontonema</i>      |      |   | 17.2 | 1  | 50.0 | 1  |
| Americas | Specialized | <i>Operculina</i>      | 9.3  | 1 | 35.7 | 1  |      |    |
| Americas | Specialized | <i>Opuntia</i>         |      |   | 24.3 | 1  |      |    |
| Americas | Specialized | <i>Pachystachys</i>    |      |   | 29.6 | 1  |      |    |
| Americas | Specialized | <i>Passiflora</i>      |      |   | 25.3 | 3  | 87.5 | 3  |
| Americas | Specialized | <i>Pavonia</i>         | 1.2  | 1 | 16.4 | 1  |      |    |
| Americas | Specialized | <i>Pavonia</i>         |      |   | 29.2 | 1  | 32.0 | 1  |
| Americas | Specialized | <i>Pedilanthus</i>     |      |   |      |    | 55.0 | 1  |

|          |             |                       |      |   |      |    |      |    |  |
|----------|-------------|-----------------------|------|---|------|----|------|----|--|
| Americas | Specialized | <i>Pellicourea</i>    | 0.7  | 1 |      |    |      |    |  |
| Americas | Specialized | <i>Penstemon</i>      | 5.0  | 1 | 26.0 | 13 | 71.3 | 8  |  |
| Americas | Specialized | <i>Pentagonia</i>     | 8.6  | 1 | 35.6 | 1  | 94.7 | 1  |  |
| Americas | Specialized | <i>Phaseolus</i>      |      |   |      |    | 66.0 | 1  |  |
| Americas | Specialized | <i>Piscidia</i>       |      |   | 22.0 | 1  |      |    |  |
| Americas | Specialized | <i>Psammisia</i>      |      |   | 22.1 | 1  | 89.6 | 1  |  |
| Americas | Specialized | <i>Psittacanthus</i>  |      |   | 18.2 | 1  | 26.0 | 2  |  |
| Americas | Specialized | <i>Puya</i>           |      |   |      |    | 57.0 | 4  |  |
| Americas | Specialized | <i>Pyrostegia</i>     |      |   | 46.3 | 1  | 74.6 | 1  |  |
| Americas | Specialized | <i>Quamoclit</i>      | 5.1  | 1 | 27.7 | 1  |      |    |  |
| Americas | Specialized | <i>Quassia</i>        |      |   | 17.0 | 1  | 58.0 | 1  |  |
| Americas | Specialized | <i>Razisea</i>        |      |   | 20.5 | 2  | 61.4 | 2  |  |
| Americas | Specialized | <i>Renealmia</i>      |      |   | 21.9 | 3  | 41.9 | 1  |  |
| Americas | Specialized | <i>Ribes</i>          |      |   |      |    | 68.0 | 1  |  |
| Americas | Specialized | <i>Rubus</i>          |      |   | 27.4 | 1  |      |    |  |
| Americas | Specialized | <i>Russelia</i>       |      |   | 28.0 | 1  | 61.0 | 4  |  |
| Americas | Specialized | <i>Saccularia</i>     |      |   |      |    | 60.8 | 1  |  |
| Americas | Specialized | <i>Salvia</i>         | 10.8 | 7 | 27.9 | 14 | 76.3 | 15 |  |
| Americas | Specialized | <i>Sanchezia</i>      |      |   | 33.0 | 1  | 71.3 | 1  |  |
| Americas | Specialized | <i>Schlumbergera</i>  |      |   |      |    | 65.0 | 1  |  |
| Americas | Specialized | <i>Scutellaria</i>    |      |   | 18.5 | 1  | 76.9 | 1  |  |
| Americas | Specialized | <i>Silena</i>         | 8.7  | 1 | 24.2 | 1  | 71.0 | 1  |  |
| Americas | Specialized | <i>Stachys</i>        |      |   | 41.5 | 1  | 81.0 | 1  |  |
| Americas | Specialized | <i>Stachytarpheta</i> |      |   | 23.0 | 1  | 50.0 | 1  |  |
| Americas | Specialized | <i>Streptosolen</i>   |      |   |      |    | 68.0 | 1  |  |
| Americas | Specialized | <i>Symbolanthus</i>   |      |   | 19.4 | 1  | 64.7 | 1  |  |
| Americas | Specialized | <i>Symphonia</i>      |      |   | 15.2 | 1  | 57.4 | 1  |  |
| Americas | Specialized | <i>Symplocos</i>      |      |   |      |    | 68.0 | 1  |  |
| Americas | Specialized | <i>Techophyllum</i>   |      |   | 15.7 | 1  |      |    |  |
| Americas | Specialized | <i>Tecoma</i>         |      |   |      |    | 2.0  | 1  |  |
| Americas | Specialized | <i>Tecophyllum</i>    |      |   | 15.7 | 1  |      |    |  |
| Americas | Specialized | <i>Thevetia</i>       |      |   |      |    | 55.0 | 2  |  |
| Americas | Specialized | <i>Tillandsia</i>     |      |   | 26.7 | 1  | 50.0 | 1  |  |
| Americas | Specialized | <i>Trichostemma</i>   |      |   | 23.0 | 1  | 70.0 | 1  |  |
| Americas | Specialized | <i>Tropaeolum</i>     |      |   | 30.2 | 4  | 78.5 | 1  |  |
| Americas | Specialized | <i>Turnera</i>        |      |   | 15.0 | 1  |      |    |  |
| Americas | Specialized | <i>Urechites</i>      |      |   | 30.0 | 1  |      |    |  |
| Americas | Specialized | <i>Vaccinium</i>      |      |   | 24.9 | 1  |      |    |  |
| Americas | Specialized | <i>Warscewiczia</i>   |      |   | 16.0 | 1  |      |    |  |
| Americas | Specialized | <i>Wigandia</i>       |      |   |      |    | 61.0 | 1  |  |
| Americas | Specialized | <i>Xerococcus</i>     |      |   |      |    | 62.0 | 1  |  |
| Americas | Specialized | <i>Xylonagra</i>      |      |   |      |    | 61.0 | 1  |  |
| Americas | Specialized | <i>Zauschneria</i>    |      |   | 19.9 | 3  | 76.0 | 1  |  |
| Americas | Specialized | <i>Zeheyra</i>        |      |   | 25.5 | 1  | 76.1 | 1  |  |
